# Supplementary material for: Ultrasound-activated nano-oxygen sensitizer for sonodynamic–radiotherapy of esophageal cancer
Source: Royal Society of Chemistry journal article supplement (doi:10.1039/d5na00042d), 2025-01-01
Supplement: d5na00042d1.pdf [file d5na00042d1.pdf]

### Supplementary figures for

A novel ultrasound-activated nano oxygen-carrying radiotherapy sensitizer combined with sonodynamic-radiotherapy for the treatment of esophageal cancer

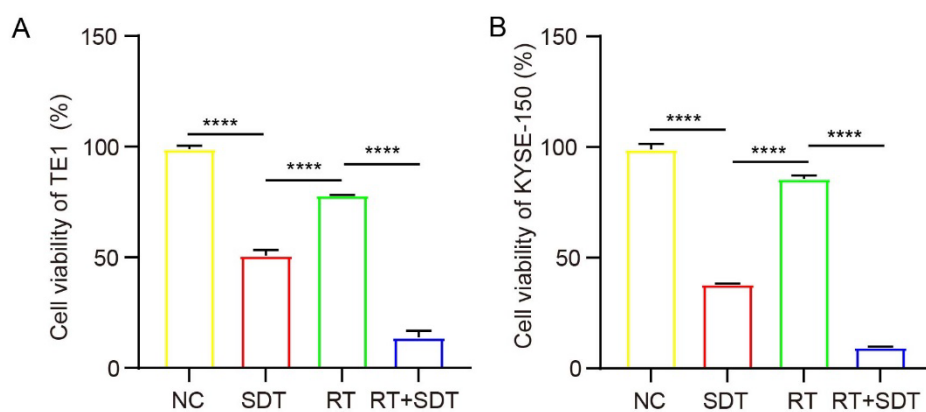

Figure S1. Cell viabilities of TE1 and KYSE-150 cells using different treatments.

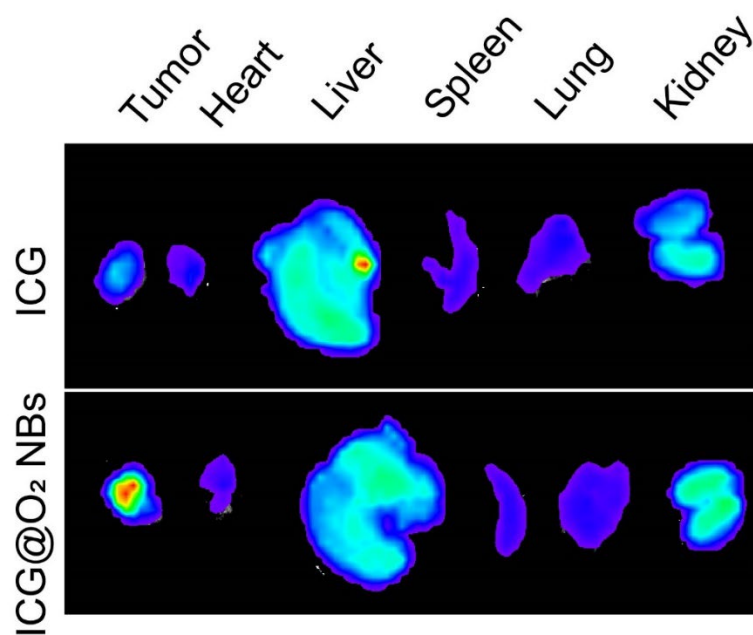

Figure S2. ex vivo fluorescence images of excised major organs and tumor tissues at 24 h post-injection.



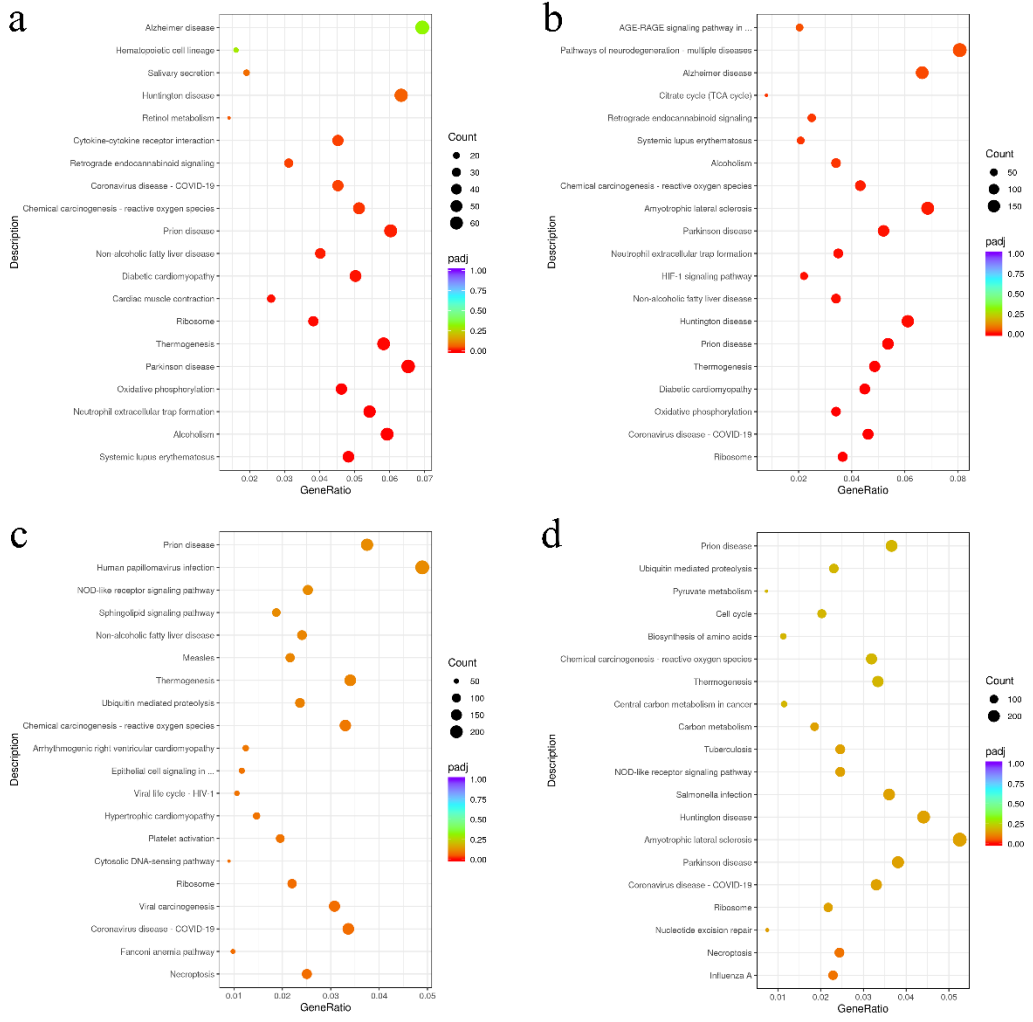

Figure S4. the detailed pathway enrichments of mRNA and lncRNA targets between different groups
